# Supplementary material for: Ambient air quality in the Kathmandu Valley, Nepal during the pre-monsoon: Concentrations and sources of particulate matter and trace gases
Source: Copernicus journal article supplement (doi:10.5194/acp-2019-333), 2019-05-08

## Supplemental Information

**Table S2:** Mean ( $\pm$  standard deviation) PM mass fractions (as %) of water-soluble inorganic ions. P-values correspond to the comparison of the mass fractions in PM<sub>2.5</sub> and PM<sub>10</sub> (n = 27 each). Stars (\*) indicates the ions whose mass fractions to PM<sub>2.5</sub> and PM<sub>10</sub> differ significantly.

| Water-soluble ion | % of PM <sub>2.5</sub> | % of PM <sub>10</sub> | p-value |
|-------------------|------------------------|-----------------------|---------|
| Ammonium          | 8.87 $\pm$ 3.02        | 5.88 $\pm$ 2.45       | <0.001* |
| Sodium            | 0.19 $\pm$ 0.28        | 1.07 $\pm$ 1.76       | 0.83    |
| Potassium         | 1.01 $\pm$ 0.40        | 0.56 $\pm$ 0.17       | <0.001* |
| Magnesium         | 0.05 $\pm$ 0.07        | 0.19 $\pm$ 0.14       | 0.01*   |
| Calcium           | 0.97 $\pm$ 1.29        | 2.42 $\pm$ 1.74       | 0.11    |
| Fluoride          | 0.09 $\pm$ 0.10        | 0.35 $\pm$ 0.22       | <0.001* |
| Chloride          | 2.02 $\pm$ 2.06        | 1.66 $\pm$ 1.29       | 0.45    |
| Nitrate           | 4.02 $\pm$ 1.92        | 3.36 $\pm$ 1.74       | 0.28    |
| Sulfate           | 16.16 $\pm$ 4.28       | 11.01 $\pm$ 3.46      | <0.001* |

**Table S3:** Ambient concentrations of PM<sub>10</sub> mass and inorganic ions measured at Bode in the Kathmandu Valley.

| Species                                              | Overall              | Daytime (8:00 am - 5:30 pm) |             | Nighttime (6:00 pm – 7:30 am) |             |
|------------------------------------------------------|----------------------|-----------------------------|-------------|-------------------------------|-------------|
|                                                      | Mean $\pm$ std. dev. | Mean $\pm$ std. dev.        | Range       | Mean $\pm$ std. dev.          | Range       |
| <b>PM<sub>10</sub> mass</b> ( $\mu\text{g m}^{-3}$ ) | 118.8 $\pm$ 56.2     | 117.0 $\pm$ 56.0            | 52.0-211.8  | 122.2 $\pm$ 56.4              | 53.6-294.0  |
| <b>Inorganic ions</b> ( $\mu\text{g m}^{-3}$ )       |                      |                             |             |                               |             |
| Ammonium                                             | 5.8 $\pm$ 2.8        | 4.2 $\pm$ 1.0               | 2.7-6.1     | 8.6 $\pm$ 3.3                 | 3.3-16.6    |
| Sodium                                               | 0.10 $\pm$ 0.10      | 0.21 $\pm$ 0.02             | 0.004-0.050 | 0.02 $\pm$ 0.02               | 0.002-0.056 |
| Potassium                                            | 0.55 $\pm$ 0.22      | 0.55 $\pm$ 0.22             | 0.26-1.01   | 0.70 $\pm$ 0.34               | 0.42-1.66   |
| Calcium                                              | 0.65 $\pm$ 0.50      | 3.5 $\pm$ 2.3               | 0.08-6.78   | 1.6 $\pm$ 1.1                 | 0.11-4.03   |
| Magnesium                                            | 0.04 $\pm$ 0.03      | 0.22 $\pm$ 0.12             | 0.04-0.41   | 0.11 $\pm$ 0.05               | 0.04-0.18   |
| Nitrate                                              | 2.7 $\pm$ 1.7        | 4.6 $\pm$ 2.7               | 2.2-11.8    | 5.6 $\pm$ 2.8                 | 2.8-12.6    |
| Sulfate                                              | 10.2 $\pm$ 3.7       | 9.6 $\pm$ 2.3               | 6.6-15.3    | 14.1 $\pm$ 3.9                | 6.9-22.5    |
| Chloride                                             | 1.5 $\pm$ 1.6        | 0.59 $\pm$ 0.42             | 0.07-1.40   | 3.3 $\pm$ 1.7                 | 0.44-7.04   |
| Fluoride                                             | 0.05 $\pm$ 0.02      | 0.23 $\pm$ 0.15             | 0.07-0.59   | 0.40 $\pm$ 0.32               | 0.07-1.23   |

std. dev. = standard deviation

**Figure S1:** Comparison of CMB model performance metrics for the sensitivity tests using different biomass and garbage burning profiles. The  $R^2$  values (a) represent the fraction of the variance measured in the ambient  $PM_{2.5}$  explained by the model. The  $\chi^2$  values (b) represent differences between the measured and calculated fitting species concentrations. Two garbage burning profiles did not show significant differences in their performance metrics.

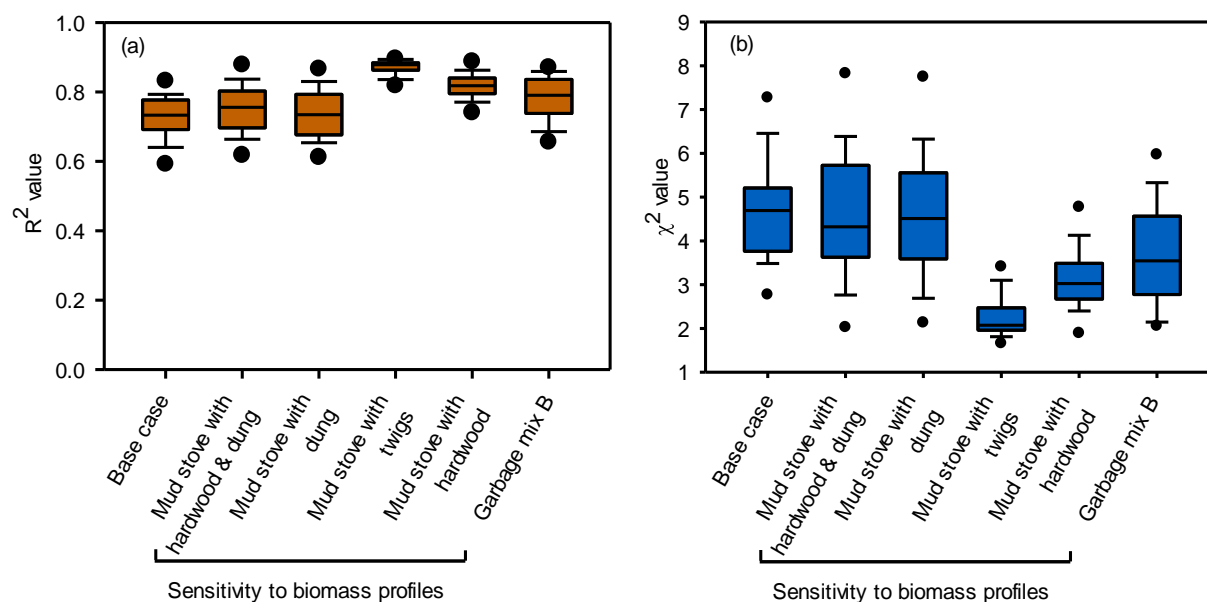

**Figure S2:** Apportionment of primary and secondary sources for  $PM_{2.5}$  EC based on CMB modeling.

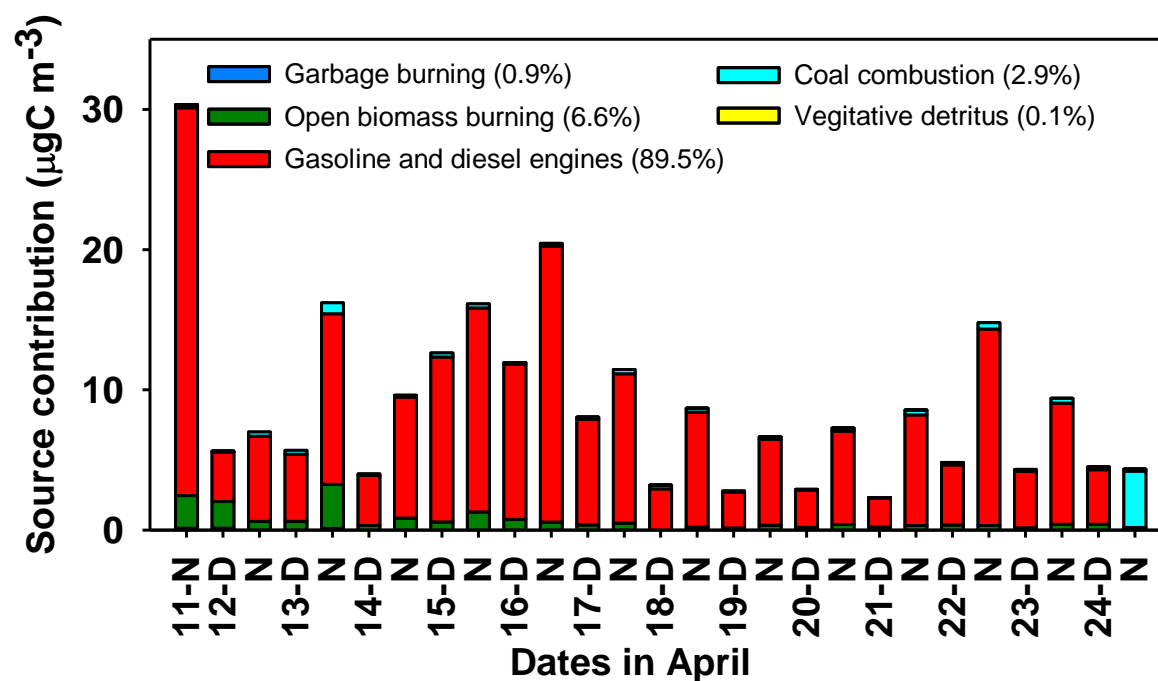

**Figure S3:** Sensitivity of CMB model results to the input source profiles: (a) sensitivity of garbage burning contributions to  $\text{PM}_{2.5}$  EC to the garbage burning profile and (b) sensitivity of biomass burning contributions to  $\text{PM}_{2.5}$  EC to biomass burning profiles.

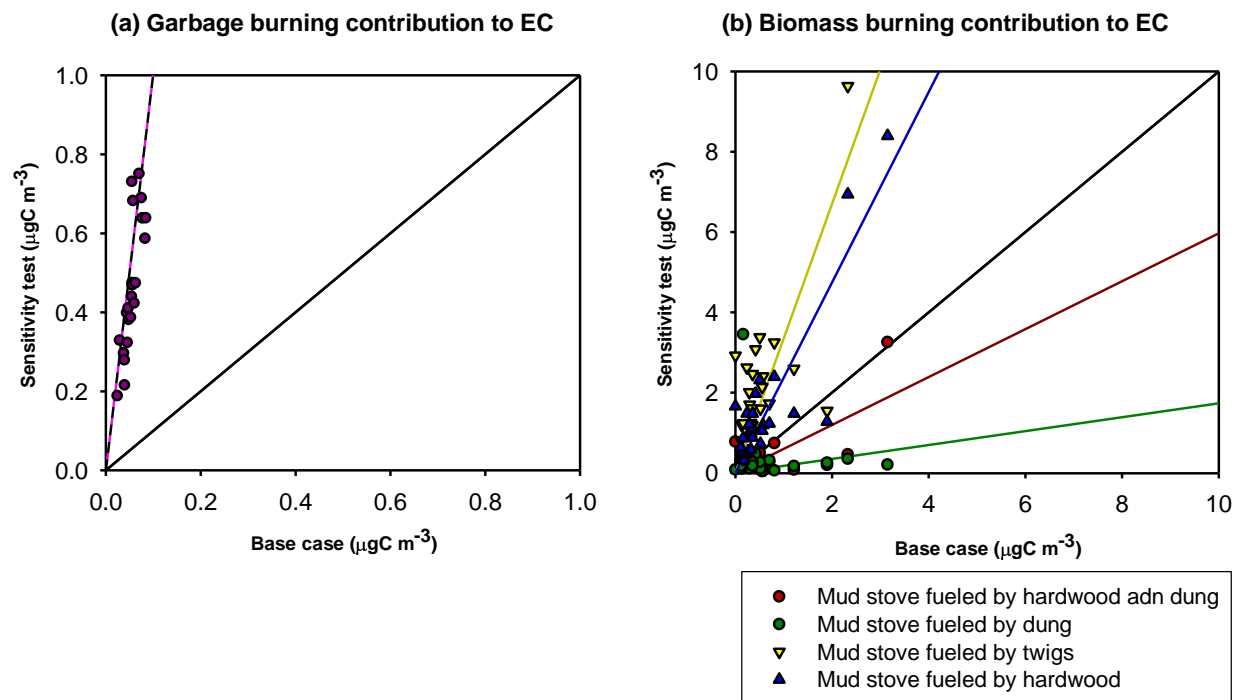

Supplement: Supplementary file 1 [file Tables S2-S3 and Figures S1-S3.pdf › Supporting Information/Tables S2-S3 and Figures S1-S3.pdf]
